# Supplementary material for: Interactions of organosulfates with water vapor under sub- and supersaturated conditions
Source: Copernicus journal article supplement (doi:10.5194/acp-2021-30), 2021-01-28
Supplement: Supplementary file 1 [file acp-2021-30-supplement.pdf]

1 **Table S1.** Surface tensions of methyl-, ethyl and octyl-OS solutions and their mixed solutions with  
 2 ammonium sulfate (AS) as a function of concentration. The mass ratio of OS to AS in mixed  
 3 solutions was 1:5.

| methyl-OS                               |                                          | ethyl-OS                                |                                          | octyl-OS                                |                                          |
|-----------------------------------------|------------------------------------------|-----------------------------------------|------------------------------------------|-----------------------------------------|------------------------------------------|
| concentration<br>(mol L <sup>-1</sup> ) | surface tension<br>(mN m <sup>-1</sup> ) | concentration<br>(mol L <sup>-1</sup> ) | surface tension<br>(mN m <sup>-1</sup> ) | concentration<br>(mol L <sup>-1</sup> ) | surface tension<br>(mN m <sup>-1</sup> ) |
| 0.00068                                 | 76.33±0.20                               | 0.00075                                 | 75.21±0.34                               | 0.00043                                 | 74.21±1.20                               |
| 0.00169                                 | 75.81±0.37                               | 0.00186                                 | 74.97±0.41                               | 0.00108                                 | 73.16±0.96                               |
| 0.00338                                 | 75.07±0.19                               | 0.00373                                 | 74.63±0.51                               | 0.00215                                 | 72.16±0.79                               |
| 0.00675                                 | 74.60±0.12                               | 0.00746                                 | 74.14±0.37                               | 0.00431                                 | 70.76±0.67                               |
| 0.01013                                 | 74.46±0.13                               | 0.01119                                 | 73.00±0.35                               | 0.00646                                 | 70.95±0.33                               |
| 0.01350                                 | 74.09±0.09                               | 0.01492                                 | 72.54±0.78                               | 0.00861                                 | 71.24±0.35                               |
| 0.01688                                 | 73.67±0.20                               | 0.01864                                 | 71.62±0.43                               | 0.01076                                 | 69.12±0.31                               |
| 0.02025                                 | 72.97±0.20                               | 0.02237                                 | 73.90±0.37                               | 0.01292                                 | 67.42±0.06                               |
| 0.02363                                 | 73.25±0.45                               | 0.02610                                 | 72.41±0.45                               | 0.01507                                 | 66.52±0.16                               |
| 0.03038                                 | 73.73±0.26                               | 0.02983                                 | 72.74±0.53                               |                                         |                                          |
|                                         |                                          | 0.03356                                 | 73.35±0.58                               |                                         |                                          |

  

| methyl-OS/AS                            |                                          | ethyl-OS/AS                             |                                          | octyl-OS/AS                             |                                          |
|-----------------------------------------|------------------------------------------|-----------------------------------------|------------------------------------------|-----------------------------------------|------------------------------------------|
| concentration<br>(mol L <sup>-1</sup> ) | surface tension<br>(mN m <sup>-1</sup> ) | concentration<br>(mol L <sup>-1</sup> ) | surface tension<br>(mN m <sup>-1</sup> ) | concentration<br>(mol L <sup>-1</sup> ) | surface tension<br>(mN m <sup>-1</sup> ) |
| 0.00151                                 | 76.00±0.10                               | 0.00147                                 | 74.75±0.02                               | 0.00135                                 | 74.92±0.23                               |
| 0.00377                                 | 75.60±0.15                               | 0.00372                                 | 74.95±0.31                               | 0.00351                                 | 74.08±0.30                               |
| 0.00755                                 | 74.73±0.22                               | 0.00743                                 | 74.04±0.15                               | 0.00702                                 | 73.39±0.20                               |
| 0.01132                                 | 75.64±0.09                               | 0.01115                                 | 74.63±0.39                               | 0.01054                                 | 72.48±0.39                               |
| 0.01510                                 | 75.46±0.25                               | 0.01486                                 | 74.39±0.32                               | 0.01405                                 | 71.64±0.26                               |
| 0.01887                                 | 75.23±0.59                               | 0.01858                                 | 74.23±0.70                               | 0.01756                                 | 71.38±0.32                               |

4

5

6

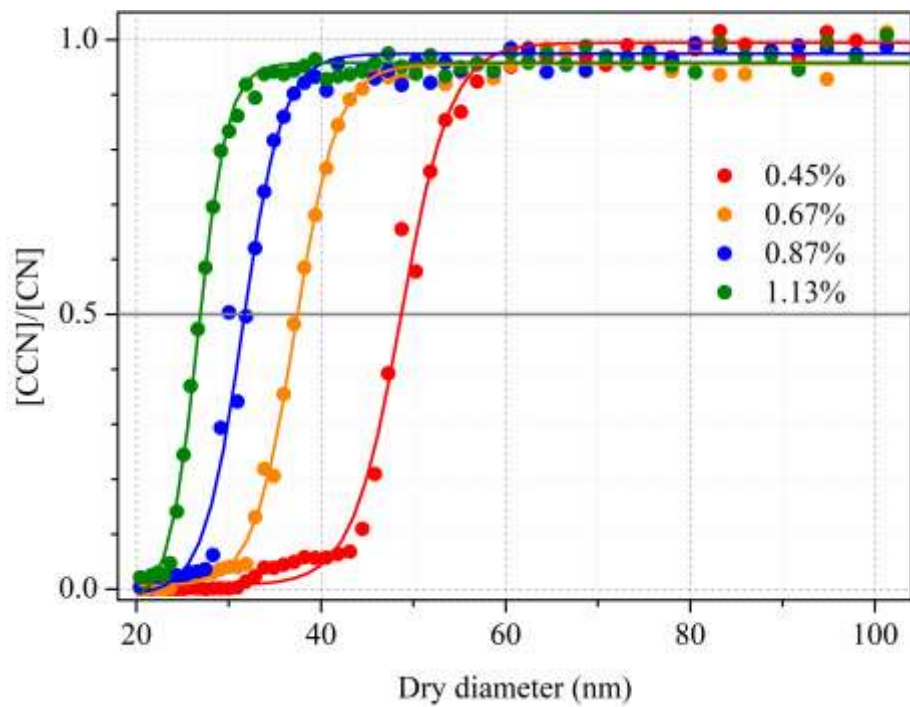

7

8 **Figure S1.** Activation fractions of ammonium sulfate aerosol as a function of dry particle diameter

9 at four supersaturations.

10

11

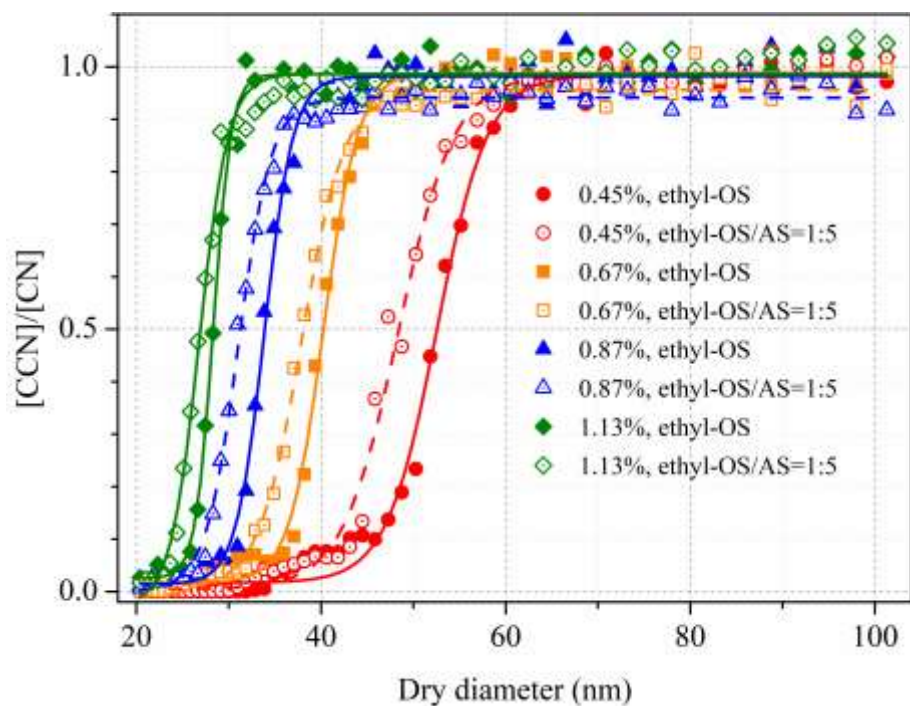

12

13 **Figure S2.** Activation fractions of ethyl-OS and its internally mixed aerosol particles with  
 14 ammonium sulfate (AS) as a function of dry particle diameter at four supersaturations.

15

16

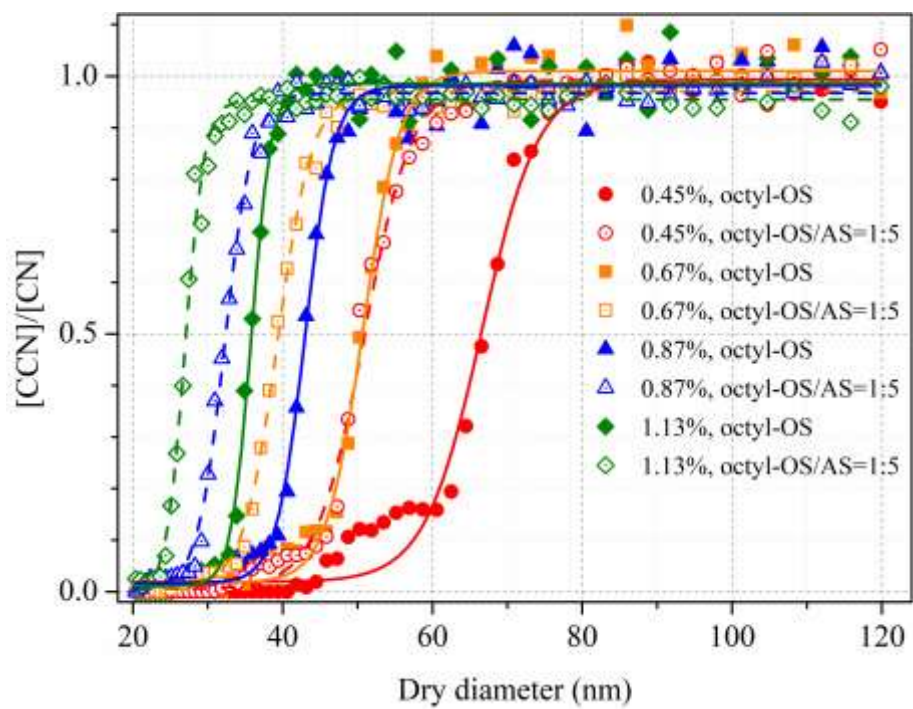

17  
 18 **Figure S3.** Activation fractions of octyl-OS and its internally mixed aerosol particles with  
 19 ammonium sulfate (AS) as a function of dry particle diameter at four supersaturations.

20  
 21

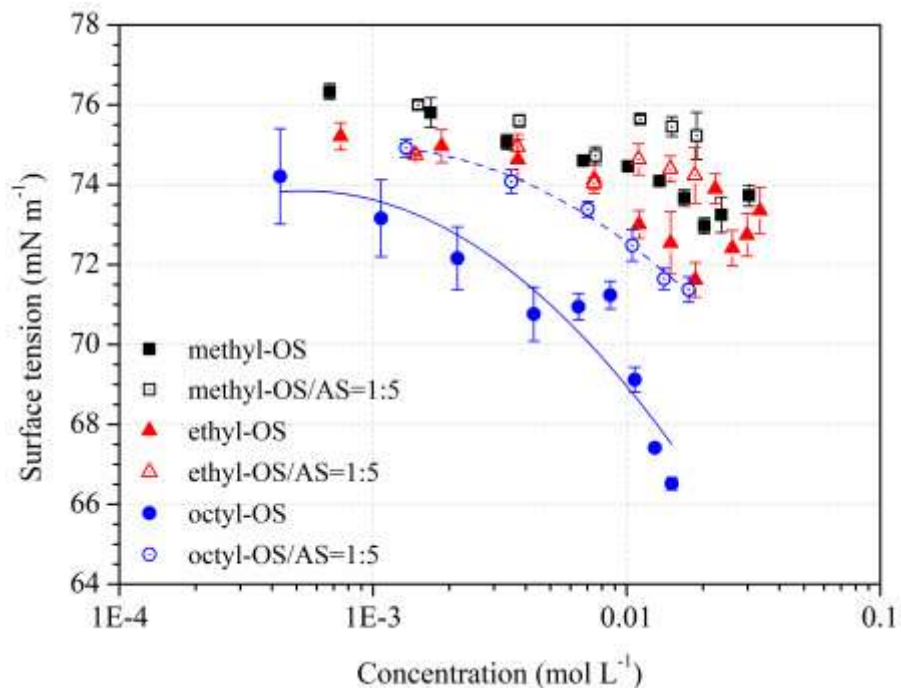

22  
 23 **Figure S4.** Surface tensions of methyl-, ethyl- and octyl-OS solutions and their mixed solutions  
 24 with ammonium sulfate (AS) as a function of concentration. The mass ratio of OS to AS in mixed  
 25 solutions was 1:5.

26  
 27
